# Supplementary material for: Next‐generation phylogeography of the cockle Cerastoderma glaucum: Highly heterogeneous genetic differentiation in a lagoon species
Source: PubMed Central journal article supplement (PMC6476780; doi:10.1002/ece3.5070), 2019-03-27
Supplement: ECE3-9-4667-s002.pdf [file ECE3-9-4667-s002.pdf]

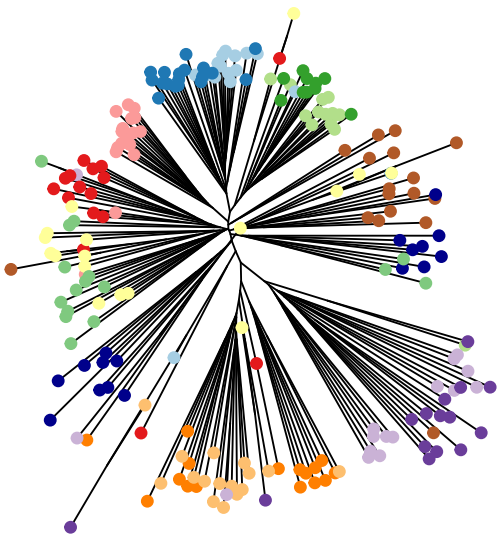

94%

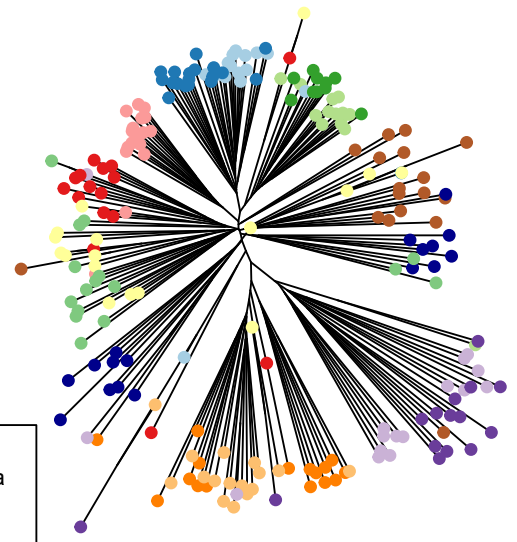

90%

- Tvärminne, Baltic Sea
- Gulf of Gdansk, Baltic Sea
- Sylt, North Sea
- Lake Verre, North Sea
- Arcachon Bay, Atlantic
- Ria Formosa, Atlantic
- Berre Lagoon, Western Med.
- Sardinia, Western Med.
- Tunis Bay, Western Med.
- Sicily, Western Med.
- Etolikon, Ionian Sea
- Gialova Lagoon, Ionian Sea
- Porto Lagos, Aegean Sea
- Constanta, Black Sea

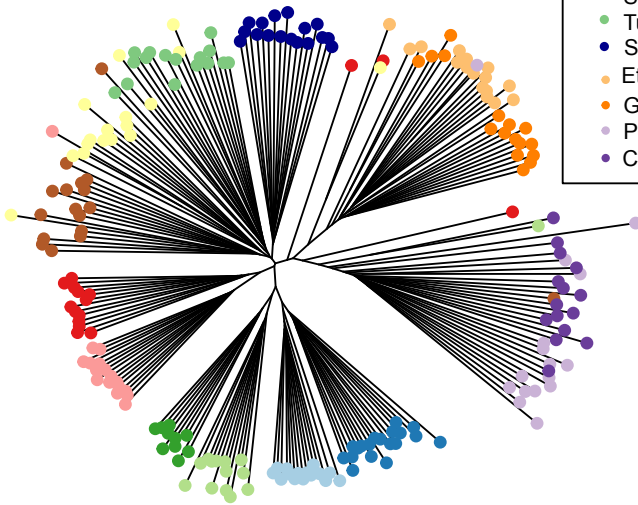

85%

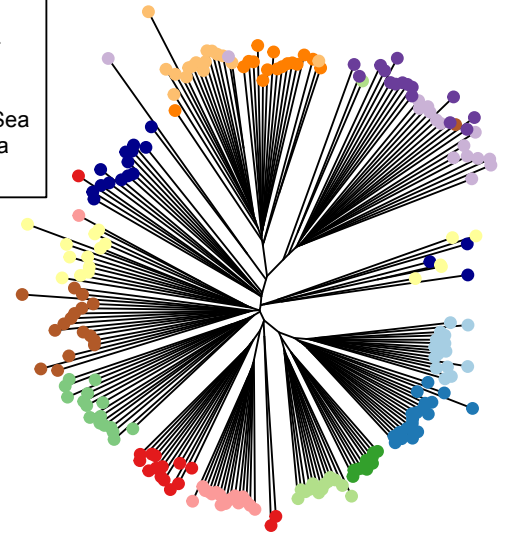

80%
