# Supplementary material for: Next‐generation phylogeography of the cockle Cerastoderma glaucum: Highly heterogeneous genetic differentiation in a lagoon species
Source: PubMed Central journal article supplement (PMC6476780; doi:10.1002/ece3.5070), 2019-03-27

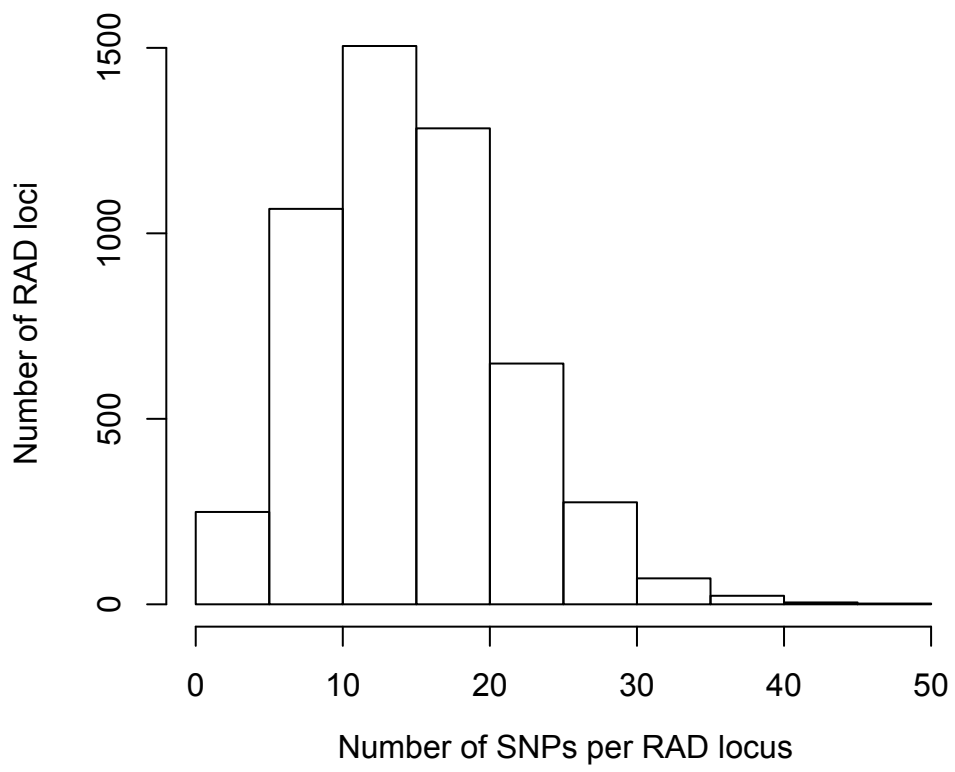

Supplement: ECE3-9-4667-s003.pdf [file ECE3-9-4667-s003.pdf]
